# Supplementary material for: Conformational specificity of opioid receptors is determined by subcellular location irrespective of agonist
Source: eLife. 2021 May 20;10:e67478. doi: 10.7554/eLife.67478 (PMC8208814; doi:10.7554/eLife.67478)
Supplement: Source data 1. [file elife-67478-data1.xlsx]

## Sheet: Figure 1
Figure 1F	Condition	Mean	Lower 95% CI of mean	Upper 95% CI of mean	SD	n (cells)
Nb39	Ctrl	1.009	0.9889	1.03	0.02872	10
	ICI	1.023	1.014	1.032	0.01718	17
	DPDPE	1.764	1.491	2.037	0.5311	17
	SNC80	1.501	1.292	1.711	0.3939	16
miniGsi	Ctrl	1.056	1.042	1.069	0.02656	17
	ICI	1.034	1.014	1.053	0.03468	15
	DPDPE	2.251	1.96	2.542	0.5657	17
	SNC80	2.825	2.221	3.429	1.047	14
miniGs	SNC80	1.078	1.066	1.09	0.02565	20
Figure 1L	Condition	Mean	Lower 95% CI of mean	Upper 95% CI of mean	SD	n (cells)
Nb39	Ctrl	1.008	1.001	1.014	0.02433	61
	DPDPE	0.9223	0.9052	0.9394	0.06669	61
	SNC80	2.175	1.964	2.385	0.7326	49
miniGsi	Ctrl	1.012	1.002	1.022	0.03691	57
	SNC80	0.9572	0.9362	0.9782	0.07466	51
miniGs	SNC80	1.006	0.9981	1.014	0.02303	36
Figure 1M	Condition	Mean	Lower 95% CI of mean	Upper 95% CI of mean	SD	n (cells)
Nb39	Ctrl	1.02	1.015	1.026	0.02213	61
	DPDPE	1.128	1.101	1.156	0.1072	61
	SNC80	1.046	1.019	1.072	0.09185	49
miniGsi	Ctrl	1.039	1.029	1.05	0.03836	57
	SNC80	1.202	1.148	1.257	0.1941	51

## Sheet: Figure 1-figure supplement 1
Figure 1-1A	Condition	Mean	Lower 95% CI of mean	Upper 95% CI of mean	SD	n (cells)
Nb39	Ctrl	10918	9638	12197	1788	10
	ICI	8349	6884	9814	2849	17
	DPDPE	9880	8153	11608	3359	17
	SNC80	8296	6875	9717	2667	16
miniGsi	Ctrl	8246	6765	9727	2881	17
	ICI	8881	7592	10171	2328	15
	DPDPE	9814	8134	11494	3268	17
	SNC80	9787	8341	11232	2503	14
miniGs	SNC80	10714	9383	12044	2843	20
Figure 1-1B	Condition	Mean	Lower 95% CI of mean	Upper 95% CI of mean	SD	n (cells)
Nb39	Ctrl	1667	1342	1993	1270	61
	DPDPE	1279	1046	1513	912.5	61
	SNC80	1725	1259	2191	1622	49
miniGsi	Ctrl	1326	1042	1611	1072	57
	SNC80	1795	1331	2258	1648	51
miniGs	SNC80	1314	956.2	1672	1058	36

## Sheet: Figure 1-figure supplement 3
Figure 1-3A	Condition	Mean	Lower 95% CI of mean	Upper 95% CI of mean	SD	n (cells)
Nb39	PI3Ki-SNC80	1.981	1.555	2.407	0.8574	18
	PI4Ki-SNC80	1.908	1.555	2.261	0.8552	25
miniGsi	PI3Ki-SNC80	0.9169	0.8505	0.9834	0.1046	12
	PI4Ki-SNC80	0.9526	0.8895	1.016	0.07556	8
Figure 1-3B	Condition	Mean	Lower 95% CI of mean	Upper 95% CI of mean	SD	n (cells)
Nb39	Untreated-SNC80	1.501	1.292	1.711	0.3939	16
	NGF-SNC80	1.643	1.309	1.977	0.361	7
miniGsi	Untreated-SNC80	2.825	2.221	3.429	1.047	14
	NGF-SNC80	2.492	2.173	2.81	0.4737	11

## Sheet: Figure 2
Figure 2C	Condition	Mean	Lower 95% CI of mean	Upper 95% CI of mean	SD	n (cells)
Nb39	ICI+SNC80	2.818	2.434	3.201	1.405	54
miniGsi	ICI+SNC80	1.054	1.043	1.065	0.04142	58
	SNC80(+PTX)	1.041	1.025	1.056	0.04356	33
		Normalized to Ctrl				Not normalized
Figure 2F	Condition	Mean	Lower 95% CI of mean	Upper 95% CI of mean	SD	Mean	Lower 95% CI of mean	Upper 95% CI of mean	SD	n (cells)
Nb39	Ctrl	1	0.9819	1.018	0.06091	1.133	1.113	1.154	0.06999	46
	CNA	1.02	0.9999	1.04	0.07003	1.157	1.134	1.18	0.07958	49
	CNA+SNC80	1.154	1.092	1.216	0.2237	1.309	1.238	1.38	0.2551	52
		Normalized to Ctrl				Not normalized
Figure 2G	Condition	Mean	Lower 95% CI of mean	Upper 95% CI of mean	SD	Mean	Lower 95% CI of mean	Upper 95% CI of mean	SD	n (cells)
miniGsi	Ctrl	1	0.9819	1.018	0.5666	1.116	1.095	1.137	0.06476	40
	CNA	1.034	1.008	1.059	0.08924	1.153	1.124	1.183	0.1036	50
	CNA+SNC80	1.002	0.9761	1.027	0.07682	1.113	1.083	1.144	0.09083	37

## Sheet: Figure 3
Figure 3C	Condition	Mean	Lower 95% CI of mean	Upper 95% CI of mean	SD	n (cells)
β-arrestin-1	Ctrl	1.015	1.006	1.025	0.01743	16
	SNC80	0.9052	0.8776	0.9327	0.07784	33
β-arrestin-2	Ctrl	0.9985	0.9813	1.016	0.02969	14
	SNC80	0.8519	0.8049	0.8989	0.141	37
Figure 3F	Condition	Mean	Lower 95% CI of mean	Upper 95% CI of mean	SD	n (cells)
β-arrestin-1	SNC80	1.667	1.486	1.848	0.3521	17
β-arrestin-2	SNC80	2.211	1.934	2.488	0.5918	20

## Sheet: Figure 4
		Normalized to Ctrl				Not normalized
Figure 4I	Condition	Mean	Lower 95% CI of mean	Upper 95% CI of mean	SD	Mean	Lower 95% CI of mean	Upper 95% CI of mean	SD	n (cells)
-Golgi receptor	Ctrl	1	0.8131	1.187	0.7171	1.397	1.13	1.665	1.027	59
	SNC80	0.2834	0.2298	0.3369	0.2035	0.373	0.307	0.439	0.2509	58
	ICI+SNC80	1.013	0.8953	1.13	0.4427	1.372	1.213	1.531	0.5996	57
+Golgi receptor	Ctrl	1	0.8173	1.183	0.6293	1.712	1.398	2.026	1.082	48
	SNC80	0.1775	0.1371	0.2178	0.142	0.3034	0.236	0.3708	0.2371	50
	ICI+SNC80	0.5141	0.4219	0.6064	0.3412	0.8928	0.7281	1.057	0.6091	55
	ICI	0.927	0.7451	1.109	0.6198	1.596	1.285	1.907	1.058	47
		Normalized to Ctrl				Not normalized
Figure 4J	Condition	Mean	Lower 95% CI of mean	Upper 95% CI of mean	SD	Mean	Lower 95% CI of mean	Upper 95% CI of mean	SD	n (cells)
-Golgi receptor	Ctrl	1	0.8099	1.19	0.7295	0.1103	0.08921	0.1315	0.08107	59
	SNC80	0.2682	0.1663	0.3701	0.3874	0.02877	0.0178	0.03974	0.04172	58
	ICI+SNC80	1.13	1.001	1.259	0.4866	0.1233	0.1091	0.1374	0.05335	57
+Golgi receptor	Ctrl	1	0.8111	1.189	0.6507	0.1378	0.1117	0.1639	0.08983	48
	SNC80	0.1667	0.09708	0.2363	0.245	0.0229	0.01348	0.03232	0.03315	50
	ICI+SNC80	0.6294	0.5236	0.7352	0.3913	0.08727	0.07242	0.1021	0.05495	55
	ICI	0.9603	0.7919	1.129	0.5736	0.134	0.1104	0.1577	0.08045	47

## Sheet: Figure 4-figure supplement 1
		Normalized to Ctrl				Not normalized
Figure 4-1G	Condition	Mean	Lower 95% CI of mean	Upper 95% CI of mean	SD	Mean	Lower 95% CI of mean	Upper 95% CI of mean	SD	n (cells)
+Golgi receptor	Ctrl	1	0.8917	1.108	0.5143	1.455	1.296	1.614	0.7546	89
	DPDPE	0.4552	0.4034	0.507	0.2625	0.661	0.5869	0.7352	0.3758	101
	ICI+DPDPE	0.9722	0.8267	1.118	0.5729	1.425	1.207	1.642	0.8561	62
	SNC80	0.3461	0.3035	0.3887	0.1998	0.5038	0.4417	0.5659	0.2915	87
	ICI+SNC80	0.7388	0.6661	0.8115	0.357	1.077	0.9699	1.183	0.524	95
		Normalized to Ctrl				Not normalized
Figure 4-1H	Condition	Mean	Lower 95% CI of mean	Upper 95% CI of mean	SD	Mean	Lower 95% CI of mean	Upper 95% CI of mean	SD	n (cells)
+Golgi receptor	Ctrl	1	0.8928	1.107	0.5089	0.1272	0.1134	0.141	0.06531	89
	DPDPE	0.4305	0.3618	0.4992	0.3479	0.05448	0.04596	0.06301	0.04318	101
	ICI+DPDPE	0.9423	0.8022	1.082	0.5515	0.1203	0.1027	0.1379	0.06938	62
	SNC80	0.4085	0.3413	0.4757	0.3154	0.05224	0.04373	0.06076	0.03996	87
	ICI+SNC80	0.7375	0.6483	0.8266	0.4376	0.09435	0.0828	0.1059	0.0567	95
